# Supplementary material
Source: publisher figshare collection journal article supplement (https://future-science-group.figshare.com/ndownloader/files/35459600)
Supplement: Supplementary file 1 [file 35459600]

Supplementary data

Table S1. Atomic coordinates (x 10^4) and equivalent isotropic displacement parameters (A^2 x 10^3) of P2 tosylate.

| Atom | x | y | z | U(eq) |
| --- | --- | --- | --- | --- |
| S(1) | 3679.4(10) | 1522.5(4) | 2123.7(2) | 20.49(17) |
| O(5) | 5036(3) | 1569.5(13) | 2543.2(7) | 25.6(4) |
| O(1) | 6295(3) | 2376.6(12) | 4404.3(7) | 27.1(5) |
| O(3) | 3091(3) | 5298. 1(14) | 1861.8(7) | 27.7(5) |
| O(4) | 2625(3) | 711.2(12) | 2070.7(8) | 26.0(5) |
| O(2) | 7304(3) | 3866.7(13) | 4142.8(8) | 27.0(5) |
| O(6) | 2207(3) | 2234.6(13) | 2084.3(8) | 29.3(5) |
| N(1) | 198(3) | 3356.0(14) | 2656.2(8) | 19.8(5) |
| C(9) | 1533(4) | 3978.1(17) | 2937.7(10) | 20.8(6) |
| C(5) | 5042(5) | 2706.3(19) | 4057.9(10) | 23.5(6) |
| C(27) | 5380(4) | 1623. l(18) | 1617.4(10) | 21.4(6) |
| C(26) | 7485(4) | 1372.9(17) | 1644.9(10) | 21.6(6) |
| C(1) | -1160(5) | 2831 8(19) | 2981(1) | 24.9(6) |
| C(8) | 2699(4) | 3524.9(19) | 3336.8(10) | 21.9(6) |
| C(11) | 1705(4) | 4900.5(18) | 2194.8(10) | 21.6(6) |
| C(10) | 2970(4) | 4431.5(18) | 2579.3( 10) | 21.3(6) |
| C(24) | 7937(5) | 1624.1(18) | 797.3(11) | 25.0(6) |
| C(3) | 2131(4) | 2714.5(18) | 3487.4(10) | 22.3(6) |
| C(6) | 5568(4) | 3543.9(19) | 3913 8(10) | 21.6(6) |
| C(12) | 301(5) | 4276. l(18) | 1924.5(10) | 22.0(6) |
| C(25) | 8732(5) | 1375.4(18) | 1237.8(10) | 24.3(6) |
| C(4) | 3318(4) | 2314.0(19) | 3844.1(10) | 24.4(6) |
| C(7) | 4411(4) | 3939.7(19) | 3561.3(10) | 21.3(6) |
| C(28) | 4565(5) | 1901.1(19) | 1182.9(11) | 26.0(6) |
| C(14) | -1110(5) | 4692.0(18) | 1545.6(11) | 25.3(6) |
| C(13) | -1097(5) | 3801.8(19) | 2284(1) | 23.8(6) |
| C(15) | -1988(5) | 4076(2) | 1169.0(11) | 26.9(7) |
| C(21) | 9392(5) | 1044(2) | 4839.7(12) | 32.0(7) |
| C(18) | 5707(5) | 1566.0(19) | 4594.5(11) | 29.0(7) |
| C(2) | 252(5) | 2250(2) | 3271.9(11) | 26.0(6) |
| C(22) | 7850(5) | 4722.8(19) | 4043.3(11) | 30.0(7) |
| C(17) | -3751(6) | 4496(2) | 880.9(12) | 37.3(8) |
| C(29) | 5827(5) | 1897(2) | 778.8(11) | 28.3(7) |
| C(19) | 7239(5) | 1362.8(19) | 4983.3(11) | 27.8(6) |
| C(16) | -237(6) | 3776(2) | 831.7(13) | 37.1(8) |
| C(23) | 9308(5) | 1619(2) | 353.7(11) | 31.5(7) |
| C(20) | 7820(5) | 446(2) | 5060.9(12) | 33.2(7) |
